# Supplementary material
Source: publisher figshare collection journal article supplement (https://tandf.figshare.com/articles/dataset/_/5576884)
Supplement: Supplementary file 1 [file 2]

**Instructions on getting access to the World Bank Enterprise Survey data and replicating results**

1. The data used in this paper are available from the World Bank Enterprise Survey team at the World Bank. The data are available for free but researchers must first sign the Enterprise Surveys Data Access Protocol. Users of this data are required to protect its confidentiality in accordance with World Bank rules governing “strictly confidential” information. These are discussed on the registration form. This form is available on the World Bank’s Enterprise Survey website ([www.enterprisesurveys.org](http://www.enterprisesurveys.org)). The data can then be retrieved directly from the World Bank at [www.enterprisesurveys.org](http://www.enterprisesurveys.org). Additional questions about the Enterprise Survey data can also be directed to the World Bank’s team at:

Enterprise Analysis Unit  
Global Indicators Department, DEC  
1818 H Street, NW  
Washington DC, 20433 USA  
Tel. (202) 473-1000  
E-mail: [enterprisesurveys@worldbank.org](mailto:enterprisesurveys@worldbank.org).

2. The results in this paper can be replicated by running the two Stata programs available in the Supplementary Materials. The first program (Nigeria Wages Firm Level Setup) sets up the data in the format required. Put both files in the same directory as the raw Nigeria data files provided by the World Bank Enterprise Surveys team (directory is C:\Nigeria Wages in the program). If the files are put in an alternate directory not entitled C:\Nigeria Wages, the researcher would have to search and replace C:\Nigeria Wages with [researcher’s own file location]. This will set up the data correctly. The author can then run Nigeria Wages Tables.do to replicate the results. This will call up the data created by the first program. If you have any questions about the programs, please e-mail “[george.clarke@tamiu.edu](mailto:george.clarke@tamiu.edu).”
